# Supplementary material for: Expanded antigen-experienced CD160+CD8+effector T cells exhibit impaired effector functions in chronic lymphocytic leukemia
Source: PubMed Central journal article supplement — J Immunother Cancer. 2021 Apr 30;9(4):e002189. doi: 10.1136/jitc-2020-002189 (PMC8098955; doi:10.1136/jitc-2020-002189), 2021-04-30

Supplementary Fig. 1

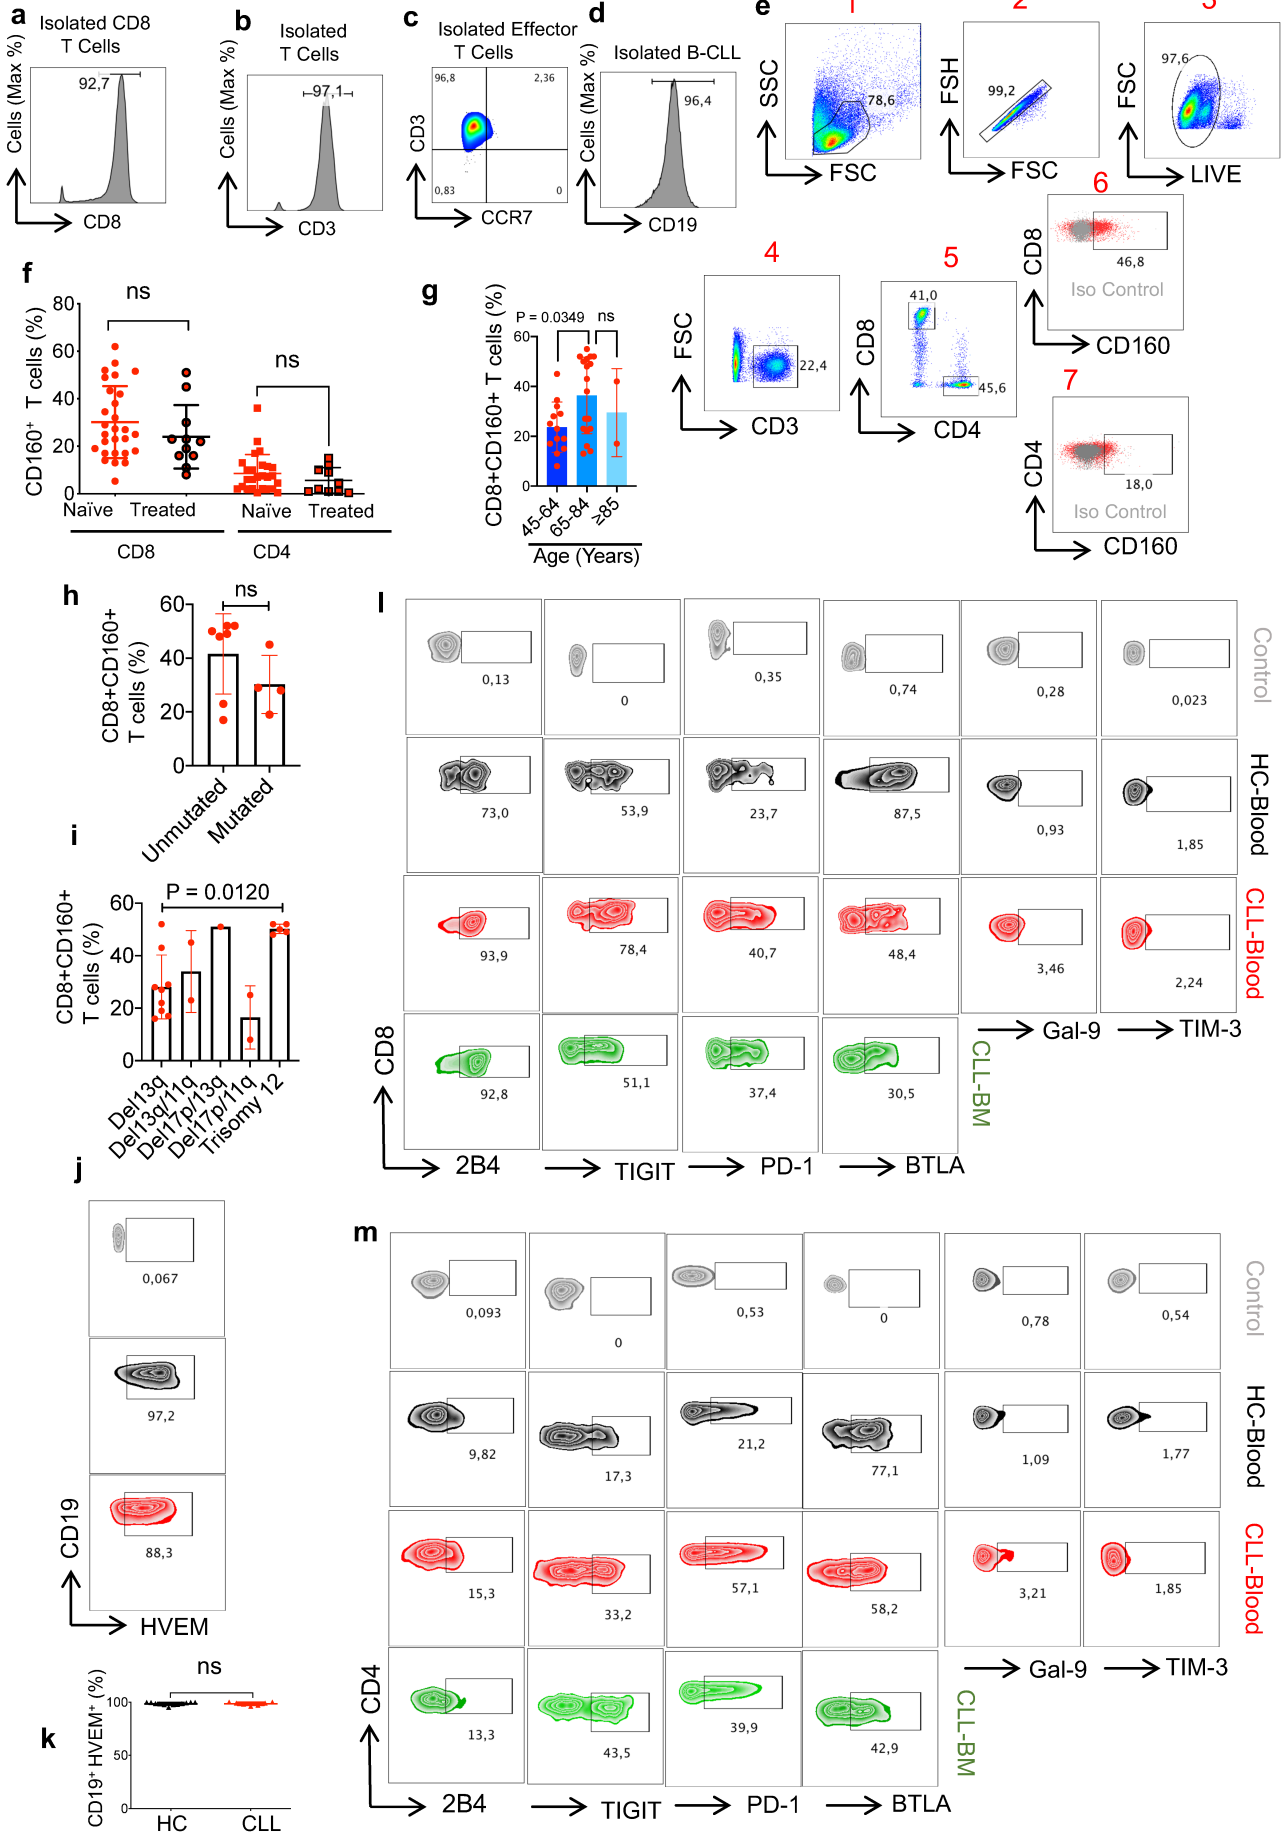

**Supplementary Fig. 1** (a) Representative flow cytometry purity plots of isolated CD8<sup>+</sup> T cells, (b) CD3<sup>+</sup> T cells, (c) CD8<sup>+</sup> effector T cells (CD3<sup>+</sup>CCR7<sup>+</sup>CD8<sup>+</sup>), and (d) B-CLLs. (e) Flow cytometry gating strategy for CD160<sup>+</sup>CD8<sup>+</sup> and CD4<sup>+</sup> T cells in CLL patients. (f) Cumulative data showing CD160 expression on CD8<sup>+</sup> and CD4<sup>+</sup> T cells in treatment naïve versus treated CLL patients. (g) Cumulative data of percentages of CD160<sup>+</sup>CD8<sup>+</sup> in different age groups of HCs. (h) Cumulative data of percentages of CD8<sup>+</sup>CD160<sup>+</sup> in CLL patients with or without IgHV mutation. (i) Cumulative data of the FISH analysis in CLL patients. (j) Representative flow cytometry plots, and (k) cumulative data of HVEM expression in B-CLL versus HCs B cells. (l) Representative flow cytometry plots of 2B4, TIGIT, PD-1, BTLA, Gal-9 and TIM-3 expression in CD8<sup>+</sup> and (m) CD4<sup>+</sup> T cells in blood of HCs versus blood and bone marrow of CLL patients. Each dot represents data from a human subject ± SD.

Supplementary Fig. 2

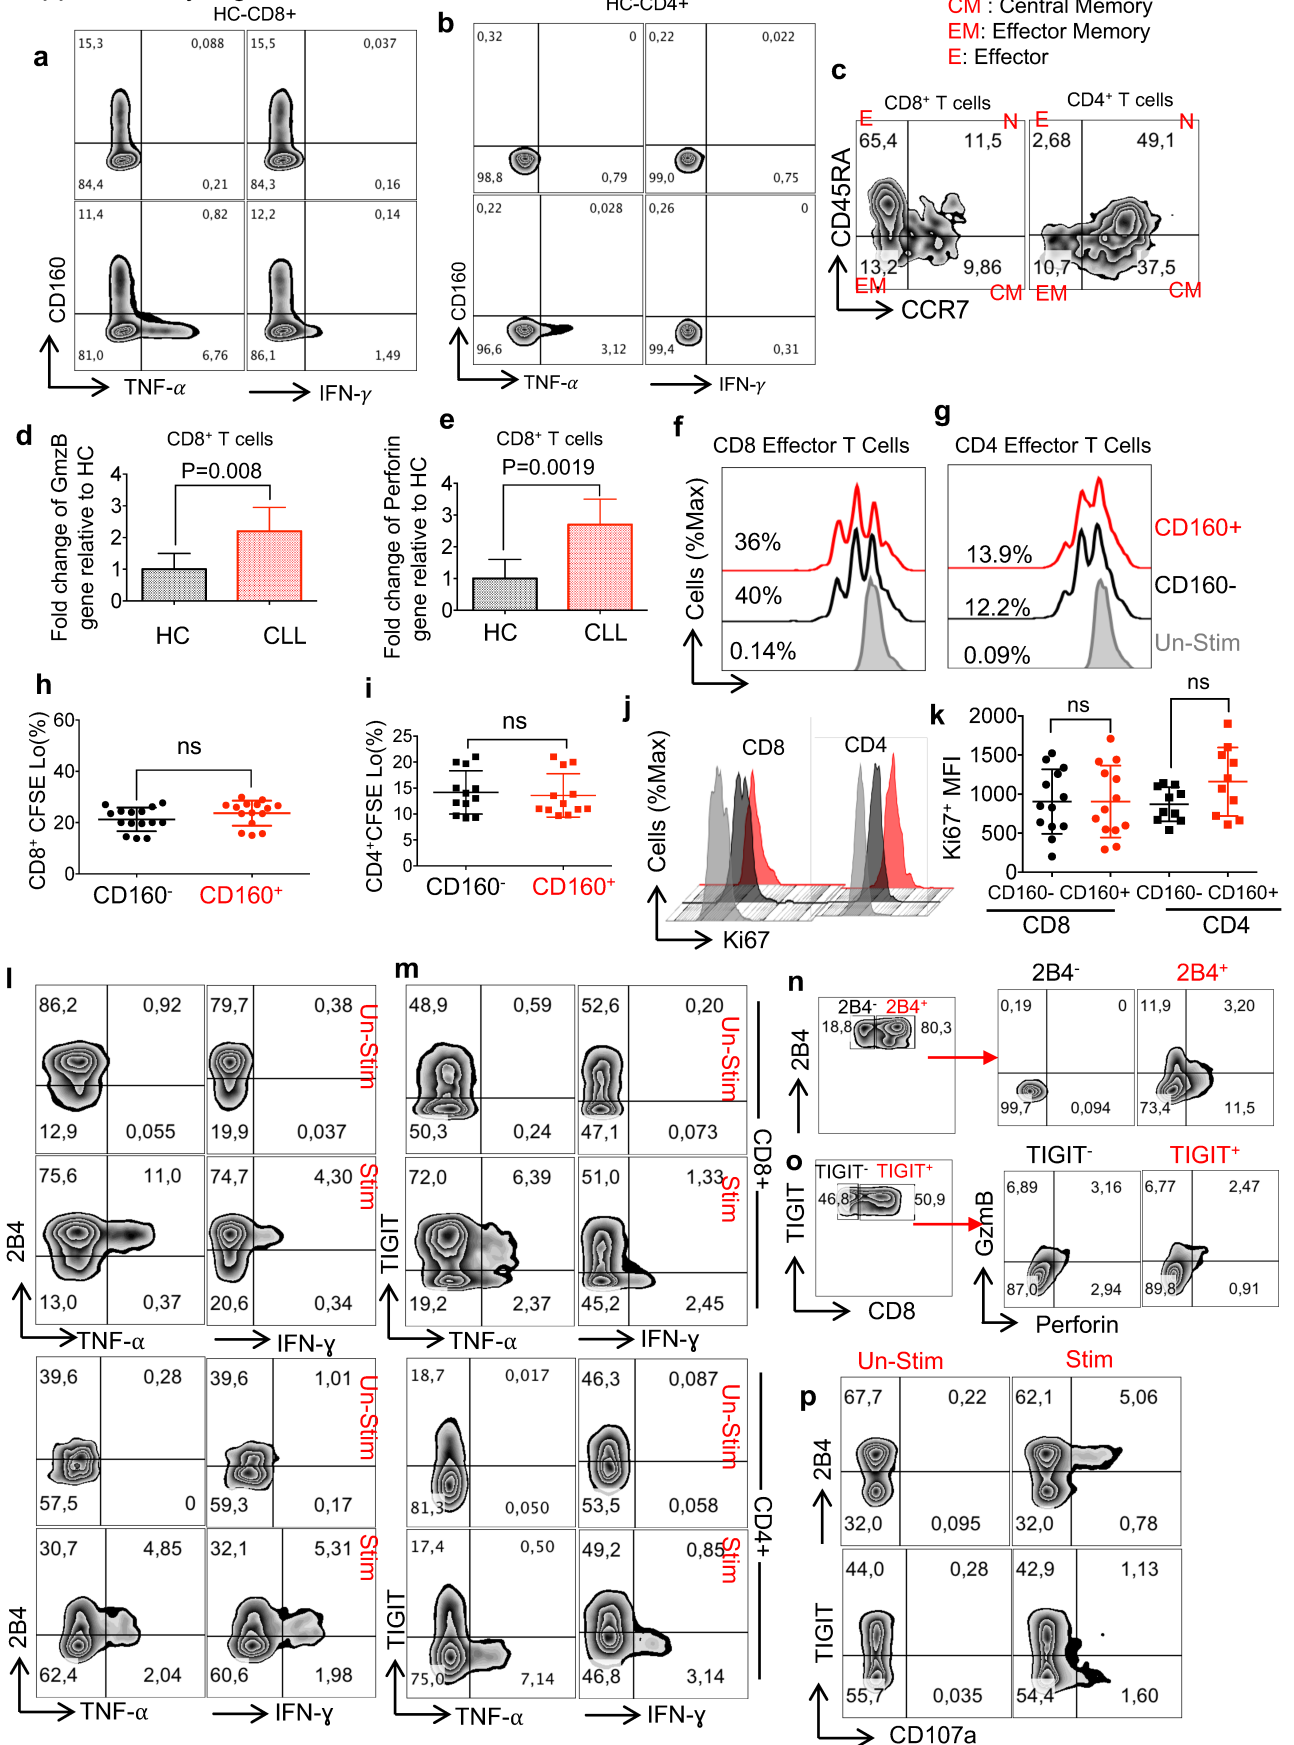

**Supplementary Fig. 2** (a) Representative plots of TNF- $\alpha$  and IFN- $\gamma$  expression in CD8+CD160+ versus CD8+CD160- T cells in HCs. (b) Representative plots of TNF- $\alpha$  and IFN- $\gamma$  expression in CD4+CD160+ versus CD4+CD160- T cells in a HC. (c) Representative flow plots of the gating strategy for T cell differential subsets in CD8+ and CD4+ cells. (d) Fold regulation of GzmB, and (e) perforin mRNA in CD8+ T cells of CLLs relative to HCs blood, data are from 6 individuals/group. (f) Representative plots of proliferation (CFSE lo) in CD160- and CD160+ either CD8+, or (g) CD4+ T cells. (h) Cumulative data of proliferation (CFSE lo) in CD160- and CD160+ either CD8+, or (i) CD4+ T cells. (j) Representative histograms, and (k) cumulative data of Ki67 expression in CD8+ and CD4+ T cells in CLL patients. (l) Representative flow cytometry plots of TNF- $\alpha$  and IFN- $\gamma$  expression in 2B4-/2B4+ either CD8+ or CD4+ T cells. (m) Representative flow cytometry plots of TNF- $\alpha$  and IFN- $\gamma$  expression in TIGIT-/TIGIT+ either CD8+ or CD4+ T cells. (n) Representative flow cytometry plots of GzmB and Perforin expression in 2B4-/2B4+ and (o) TIGIT-/TIGIT+ CD8+ T cells. (p) Representative flow cytometry plots of CD107a expression in 2B4-/2B4+ and TIGIT-/TIGIT+ CD8+ T cells. Each dot represents data from a human subject  $\pm$  SD.

Supplementary Fig. 3

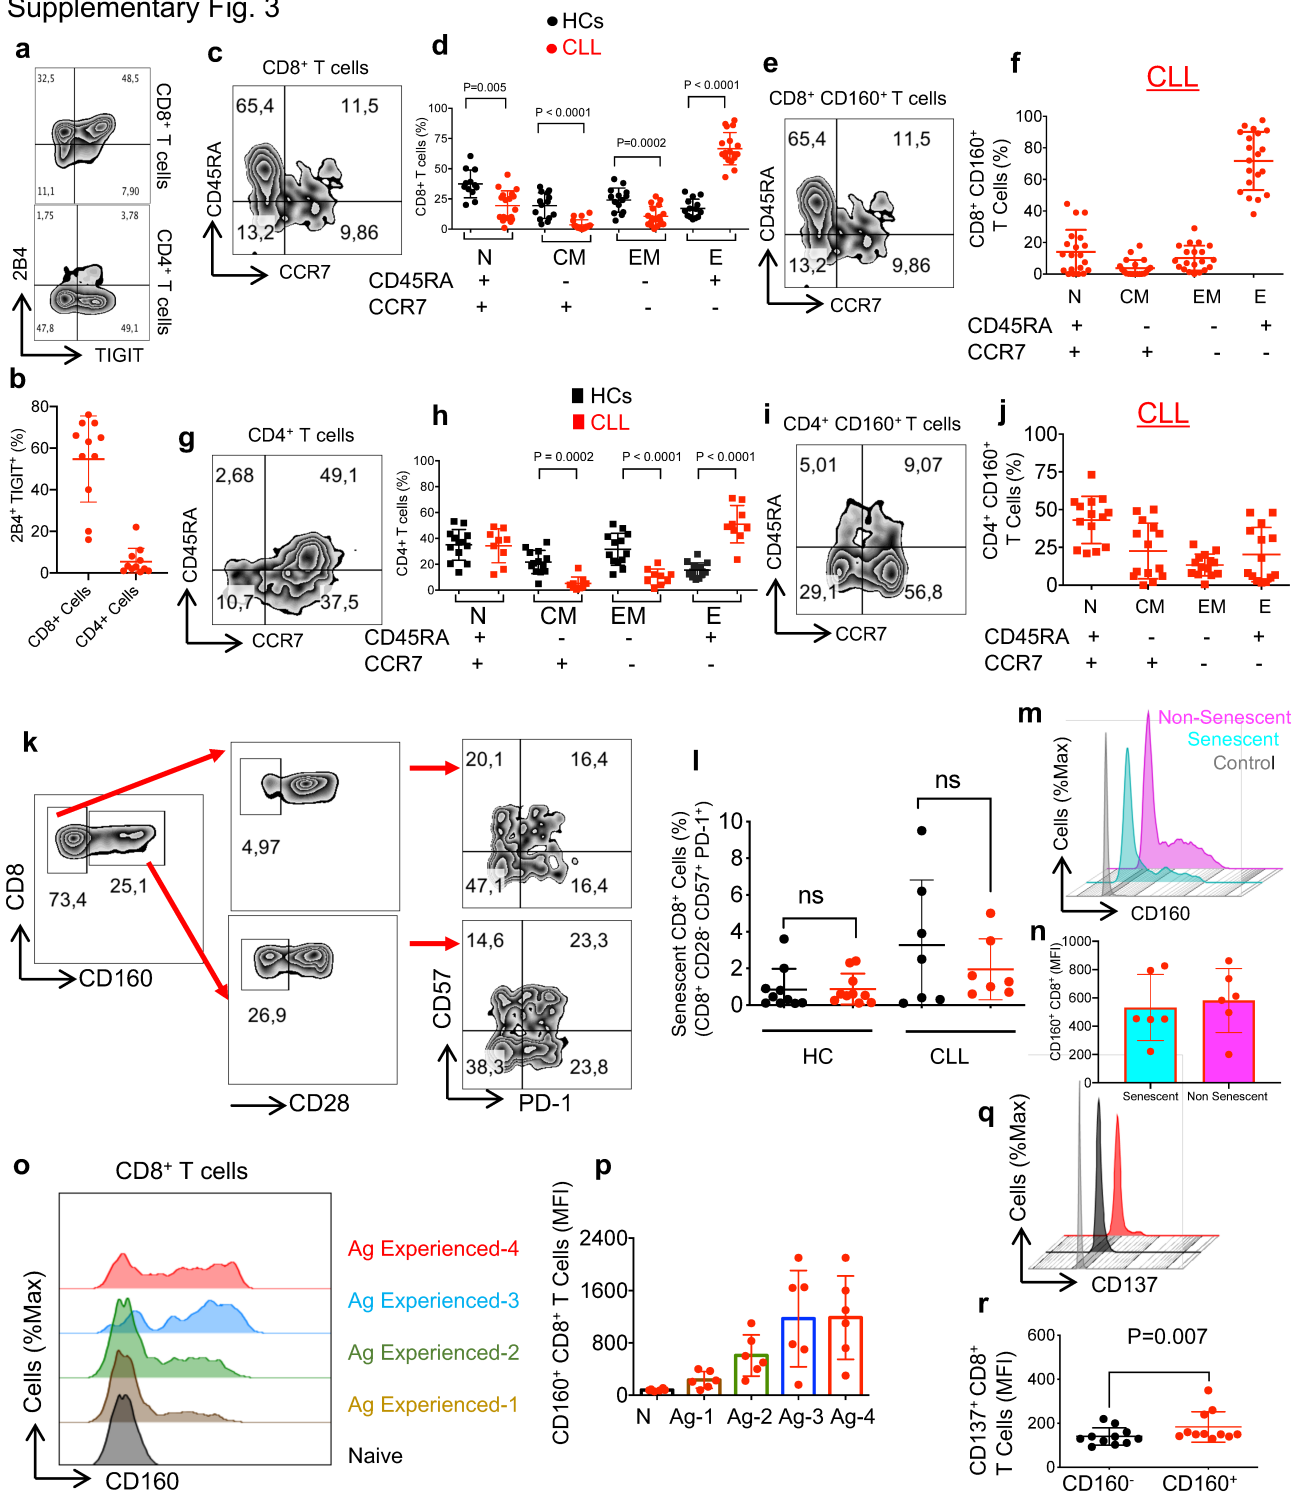

**Supplementary Fig. 3** (a) Representative plots, and (b) cumulative data of 2B4 and TIGIT co-expression in CD8<sup>+</sup> and CD4<sup>+</sup> T cells of CLL patients. (c) Representative flow cytometry plot of CD45RA and CCR7 expression in CD8<sup>+</sup> T cells in the blood of CLLs. (d) Cumulative data showing expression of different subsets of CD8<sup>+</sup> T cells in CLLs (N: Naive, CM: Central memory, EM: Effector memory, E: Effector) vs HCs. (e) Representative flow cytometry plot of the expression of CD45RA and CCR7 in CD160<sup>+</sup>CD8<sup>+</sup> T cells. (f) Cumulative data showing differential subset distribution of CD160<sup>+</sup> CD8<sup>+</sup> T cells in CLL patients. (g) Representative flow cytometry plot of CD45RA and CCR7 expression in CD4<sup>+</sup> T cells in CLLs. (h) Cumulative data showing the expression of different subsets of CD4<sup>+</sup> T cells in CLLs (N: Naive, CM: Central memory, EM: Effector memory, E: Effector) vs HCs. (i) Representative flow cytometry plot of expression of CD45RA and CCR7 in CD160<sup>+</sup> CD4<sup>+</sup> T cells. (j) Cumulative data showing differential subset distribution of CD160<sup>+</sup> CD4<sup>+</sup> T cells. (k) Representative flow plots, and (l) cumulative data of CD28, CD57, PD-1 expression in CD160<sup>+</sup> CD8<sup>+</sup> T cells (CD28<sup>-</sup> CD57<sup>+</sup> PD-1<sup>+</sup> considered as senescent cells). (m) Histogram plots, and (n) cumulative data showing the mean fluorescence intensity (MFI) of senescent cells (CD28<sup>-</sup>CD57<sup>+</sup>PD-1<sup>+</sup>) in CD160<sup>+</sup>CD8<sup>+</sup> T cells. (o) Representative flow cytometry plot of percent expression of CD160<sup>+</sup> in Naive (CD27<sup>+</sup>CD28<sup>+</sup>CD45RA<sup>+</sup>CCR7<sup>+</sup>CD57<sup>-</sup>), Ag experienced level-1 (CD27<sup>+</sup>CD28<sup>+</sup>CD45RA<sup>-</sup>CCR7<sup>+</sup>CD57<sup>-</sup>), Ag experienced level-2 (CD27<sup>+</sup>CD28<sup>+</sup>CD45RA<sup>-</sup>CCR7<sup>-</sup>CD57<sup>+/-</sup>), Ag experienced level-3 (CD27<sup>+</sup>CD28<sup>+</sup>CD45RA<sup>+/-</sup>CCR7<sup>-</sup>CD57<sup>+/-</sup>) and Ag experienced level-4 (CD27<sup>-</sup>CD28<sup>-</sup>CD45RA<sup>-</sup>CCR7<sup>-</sup>CD57<sup>+</sup>) subsets of CD8<sup>+</sup> T cells. (p) Quantification of MFI of CD160<sup>+</sup> in Naive (CD27<sup>+</sup>CD28<sup>+</sup>CD45RA<sup>+</sup>CCR7<sup>+</sup>CD57<sup>-</sup>), Ag experienced level-1 (CD27<sup>+</sup>CD28<sup>+</sup>CD45RA<sup>-</sup>CCR7<sup>+</sup>CD57<sup>-</sup>), Ag experienced level-2 (CD27<sup>+</sup>CD28<sup>+</sup>CD45RA<sup>-</sup>CCR7<sup>-</sup>CD57<sup>+/-</sup>), Ag experienced level-3 (CD27<sup>+</sup>CD28<sup>+</sup>CD45RA<sup>+/-</sup>CCR7<sup>-</sup>CD57<sup>+/-</sup>) and Ag experienced level-4 (CD27<sup>-</sup>CD28<sup>-</sup>CD45RA<sup>-</sup>CCR7<sup>-</sup>CD57<sup>+</sup>) subsets of CD8<sup>+</sup> T cells. (q) Representative flow cytometry plot, and (r) quantification of MFI of CD137<sup>+</sup>CD160<sup>+</sup>/CD160<sup>+</sup> CD8<sup>+</sup> T cells. Each dot represents data from a human subject ± SD.

Supplementary Fig. 4

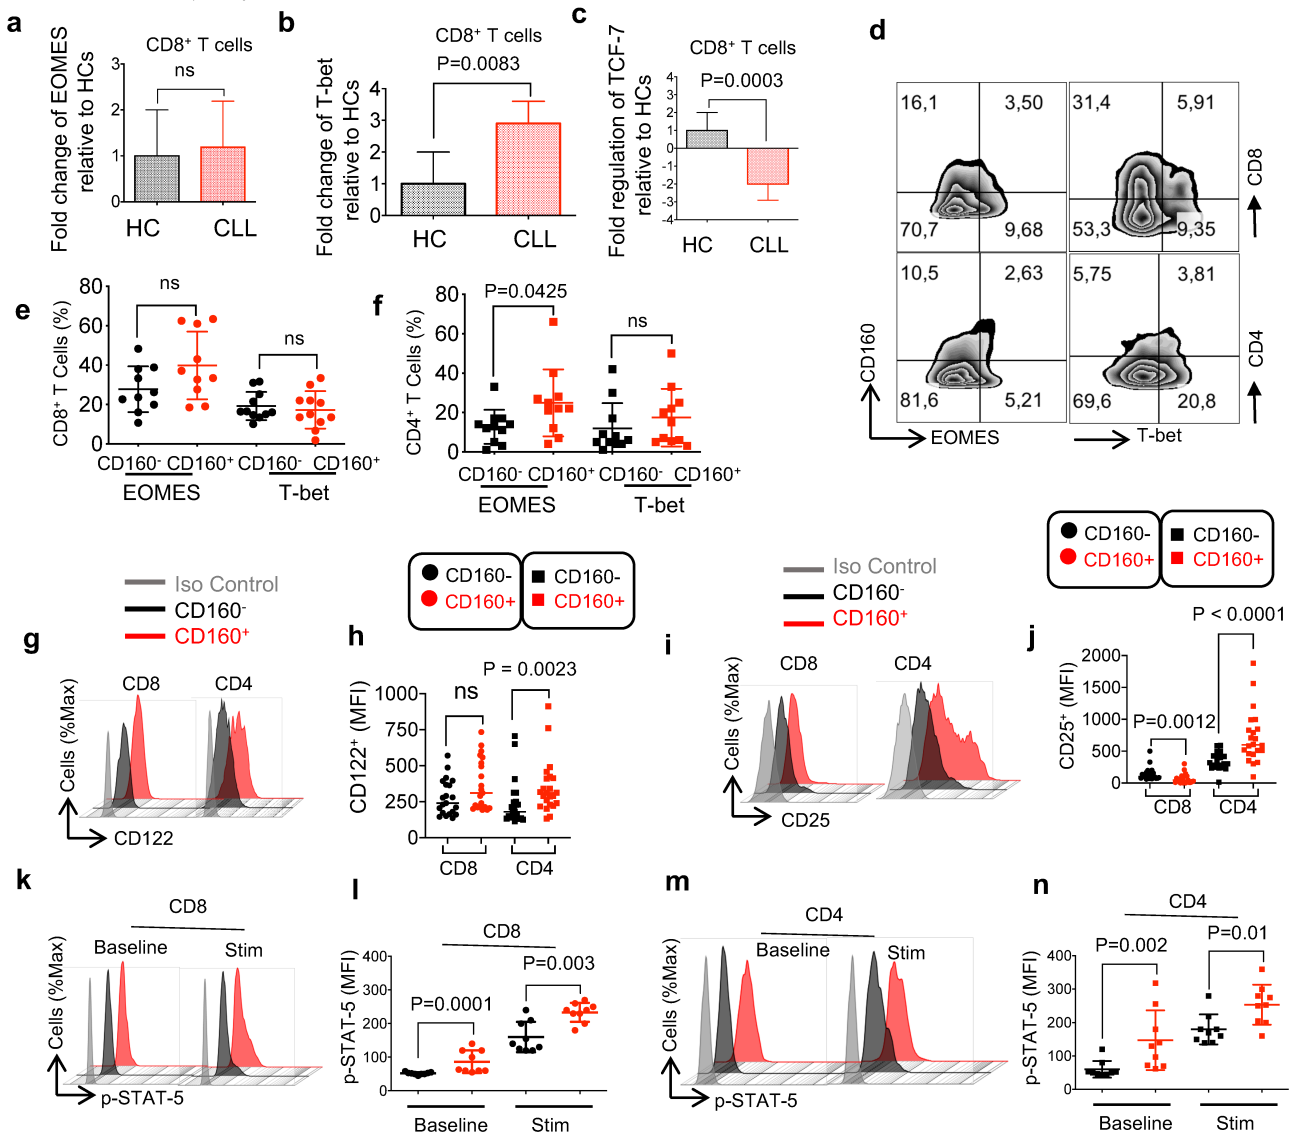

**Supplementary Fig. 4** (a) Expression of EOMES mRNA in CD8<sup>+</sup> T cells of CLLs relative to HCs. (b) Expression of T-bet mRNA in CD8<sup>+</sup> T cells of CLLs relative to HCs. (c) Expression of TCF-7 mRNA in CD8<sup>+</sup> T cells of CLLs relative to HCs. (d) Representative flow cytometry plots of EOMES and T-bet expression in CD160<sup>-</sup>/CD160<sup>+</sup> CD8<sup>+</sup> and CD4<sup>+</sup> T cells. (e) Cumulative data showing percent expression of EOMES and T-bet in CD160<sup>-</sup>/CD160<sup>+</sup> CD8<sup>+</sup> T cells. (f) Cumulative data showing percent expression of EOMES and T-bet in CD160<sup>-</sup>/CD160<sup>+</sup> CD4<sup>+</sup> T cells. (g) Representative flow cytometry plots of CD122 (IL-2R $\beta$ ) expression in CD160<sup>-</sup>/CD160<sup>+</sup> CD8<sup>+</sup> and CD4<sup>+</sup> T cells. (h) Quantification of MFI for CD122 in CD160<sup>-</sup>/CD160<sup>+</sup> CD8<sup>+</sup> and CD4<sup>+</sup> T cells. (i) Representative flow cytometry plots of CD25 (IL-2R $\alpha$ ) expression in CD160<sup>-</sup>/CD160<sup>+</sup> CD8<sup>+</sup> and CD4<sup>+</sup> T cells. (j) Quantification of MFI for CD25 in CD160<sup>-</sup>/CD160<sup>+</sup> CD8<sup>+</sup> and CD4<sup>+</sup> T cells. (k) Representative flow cytometry plots of pSTAT-5 expression in CD160<sup>-</sup>/CD160<sup>+</sup> CD8<sup>+</sup> T cells at the baseline and after *in vitro* stimulation with recombinant human IL-2 (100 IU/ml). (l) Quantification of MFI of pSTAT-5 in CD160<sup>-</sup>/CD160<sup>+</sup> CD8<sup>+</sup> T cells at the baseline and after *in vitro* stimulation with recombinant human IL-2 (100 IU/ml). (m) Representative flow cytometry plots of pSTAT-5 expression in CD160<sup>-</sup>/CD160<sup>+</sup> CD4<sup>+</sup> T cells at the baseline and after *in vitro* stimulation with recombinant human IL-2 (100 IU/ml). (n) Quantification of MFI for pSTAT-5 in CD160<sup>-</sup>/CD160<sup>+</sup> CD4<sup>+</sup> T cells at the baseline and after *in vitro* stimulation with recombinant human IL-2 (100 IU/ml). Each dot represents data from a human subject  $\pm$  SD, cumulative data in a-c are from 6 human subjects/group.

## Supplementary Fig. 5

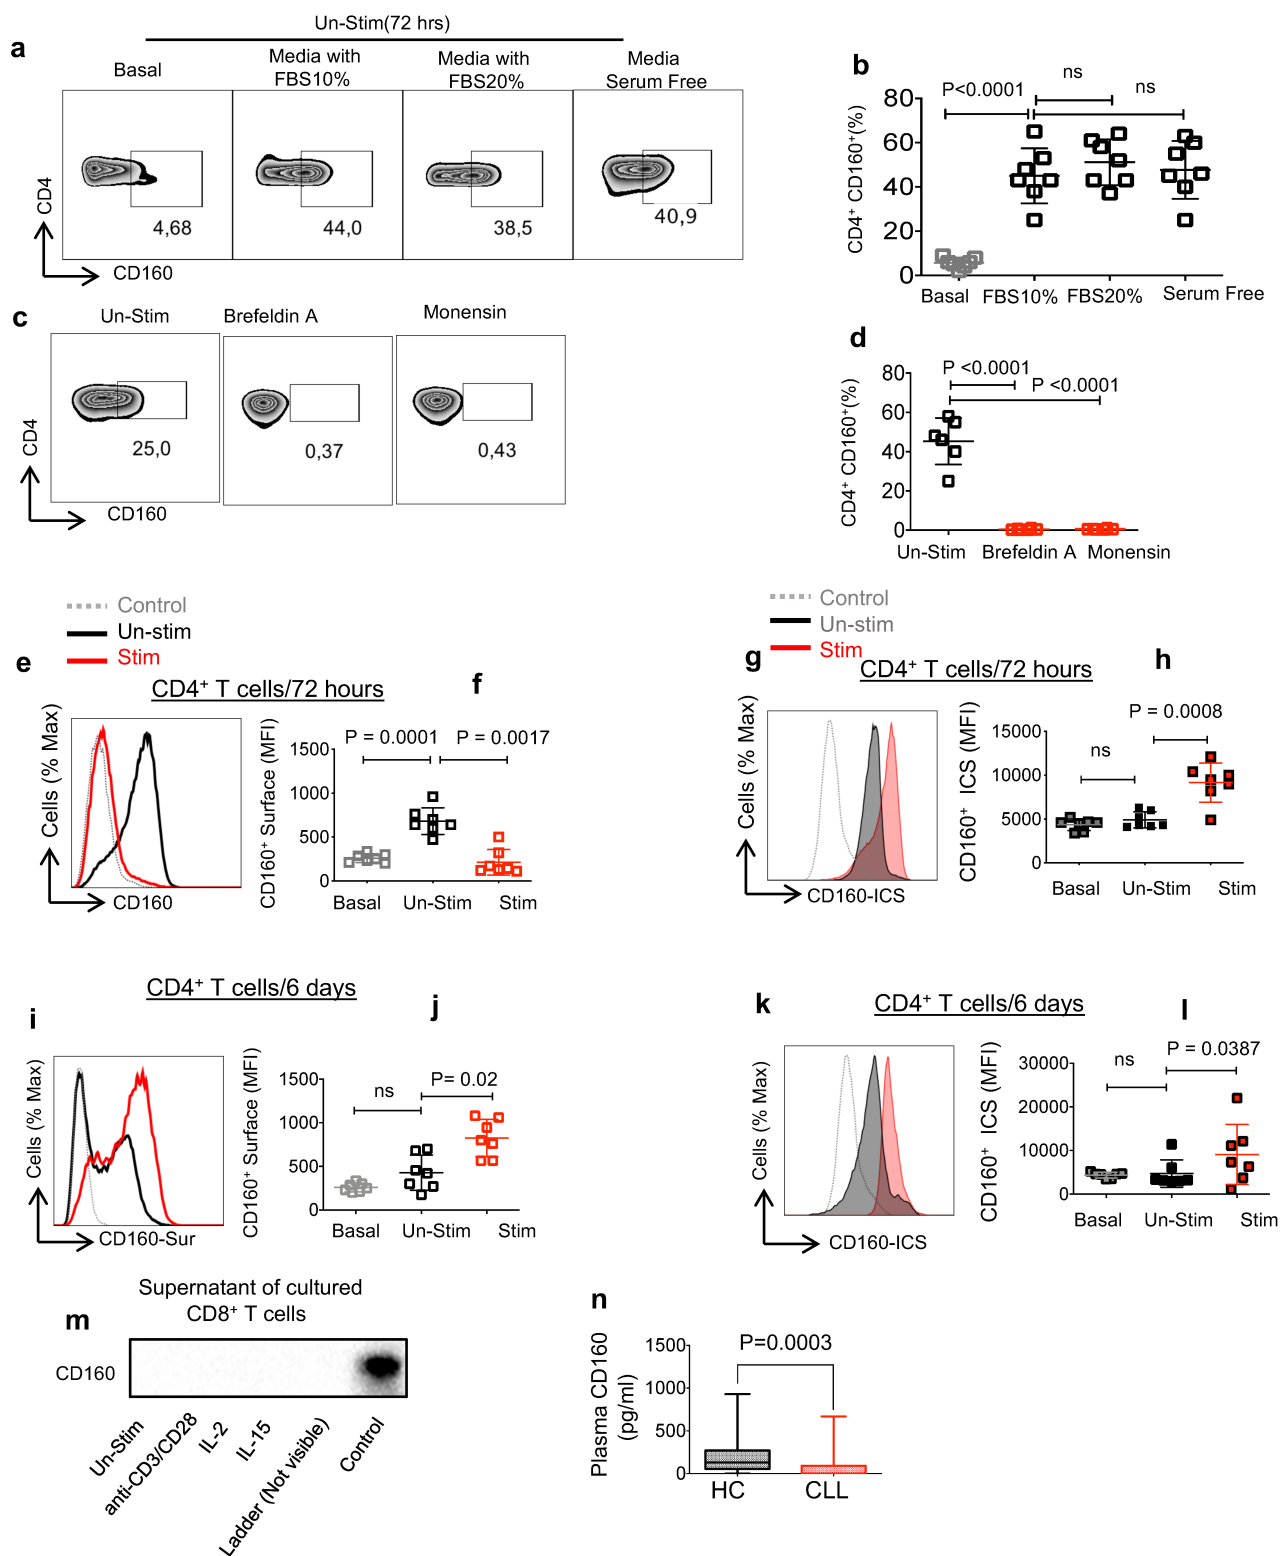

**Supplementary Fig. 5** (a) Representative flow plots, and (b) cumulative data of CD160 expression at the baseline and following culture in RPMI media supplemented with FBS (10% and 20%) or serum free for 72 hours. (c) Representative flow plots, and (d) cumulative data of CD160 expression on CD4 T cells after 16 hours culture with supplementation of brefeldin A or Monensin. (e) Representative histogram, and (f) cumulative data of surface CD160 expression on CD4<sup>+</sup> T cells after 72 hours stimulation (Stim) with the anti-CD3/CD28 compared to unstimulated cells (un-Stim). (g) Representative histogram, and (h) and cumulative data of intra-cytoplasmic CD160 expression in CD4<sup>+</sup> T cells after 72 hours stimulation with the anti-CD3/CD28 compared to Un-Stim. (i) Representative histogram, and (j) cumulative data of surface CD160 expression on CD4<sup>+</sup> T cells after 6 days of stimulation with the anti-CD3/CD28 compared to Un-Stim. (k) Representative histogram, and (l) cumulative data of intracytoplasmic CD160 expression in CD4<sup>+</sup> T cells after 6 days of stimulation stimulated with the anti-CD3/CD28 compared to Un-Stim. Each dot represents data from a human subject  $\pm$  SD. (m) The blot is showing CD160 protein expression in the culture supernatant from PBMCs of a CLL patient either un-stim or stimulated with the anti-CD3/CD28, IL-2, and IL-5 compared to the positive control (cell pellet) measured by the Western blotting. (n) Data of quantification of the plasma CD160 in HCs versus CLL patients measured by ELISA. Each dot represents data from a human subject/single experiment  $\pm$  SD, cumulative data in (n) are from 23 HCs and 41 CLL human subjects.

## Supplementary Fig. 6

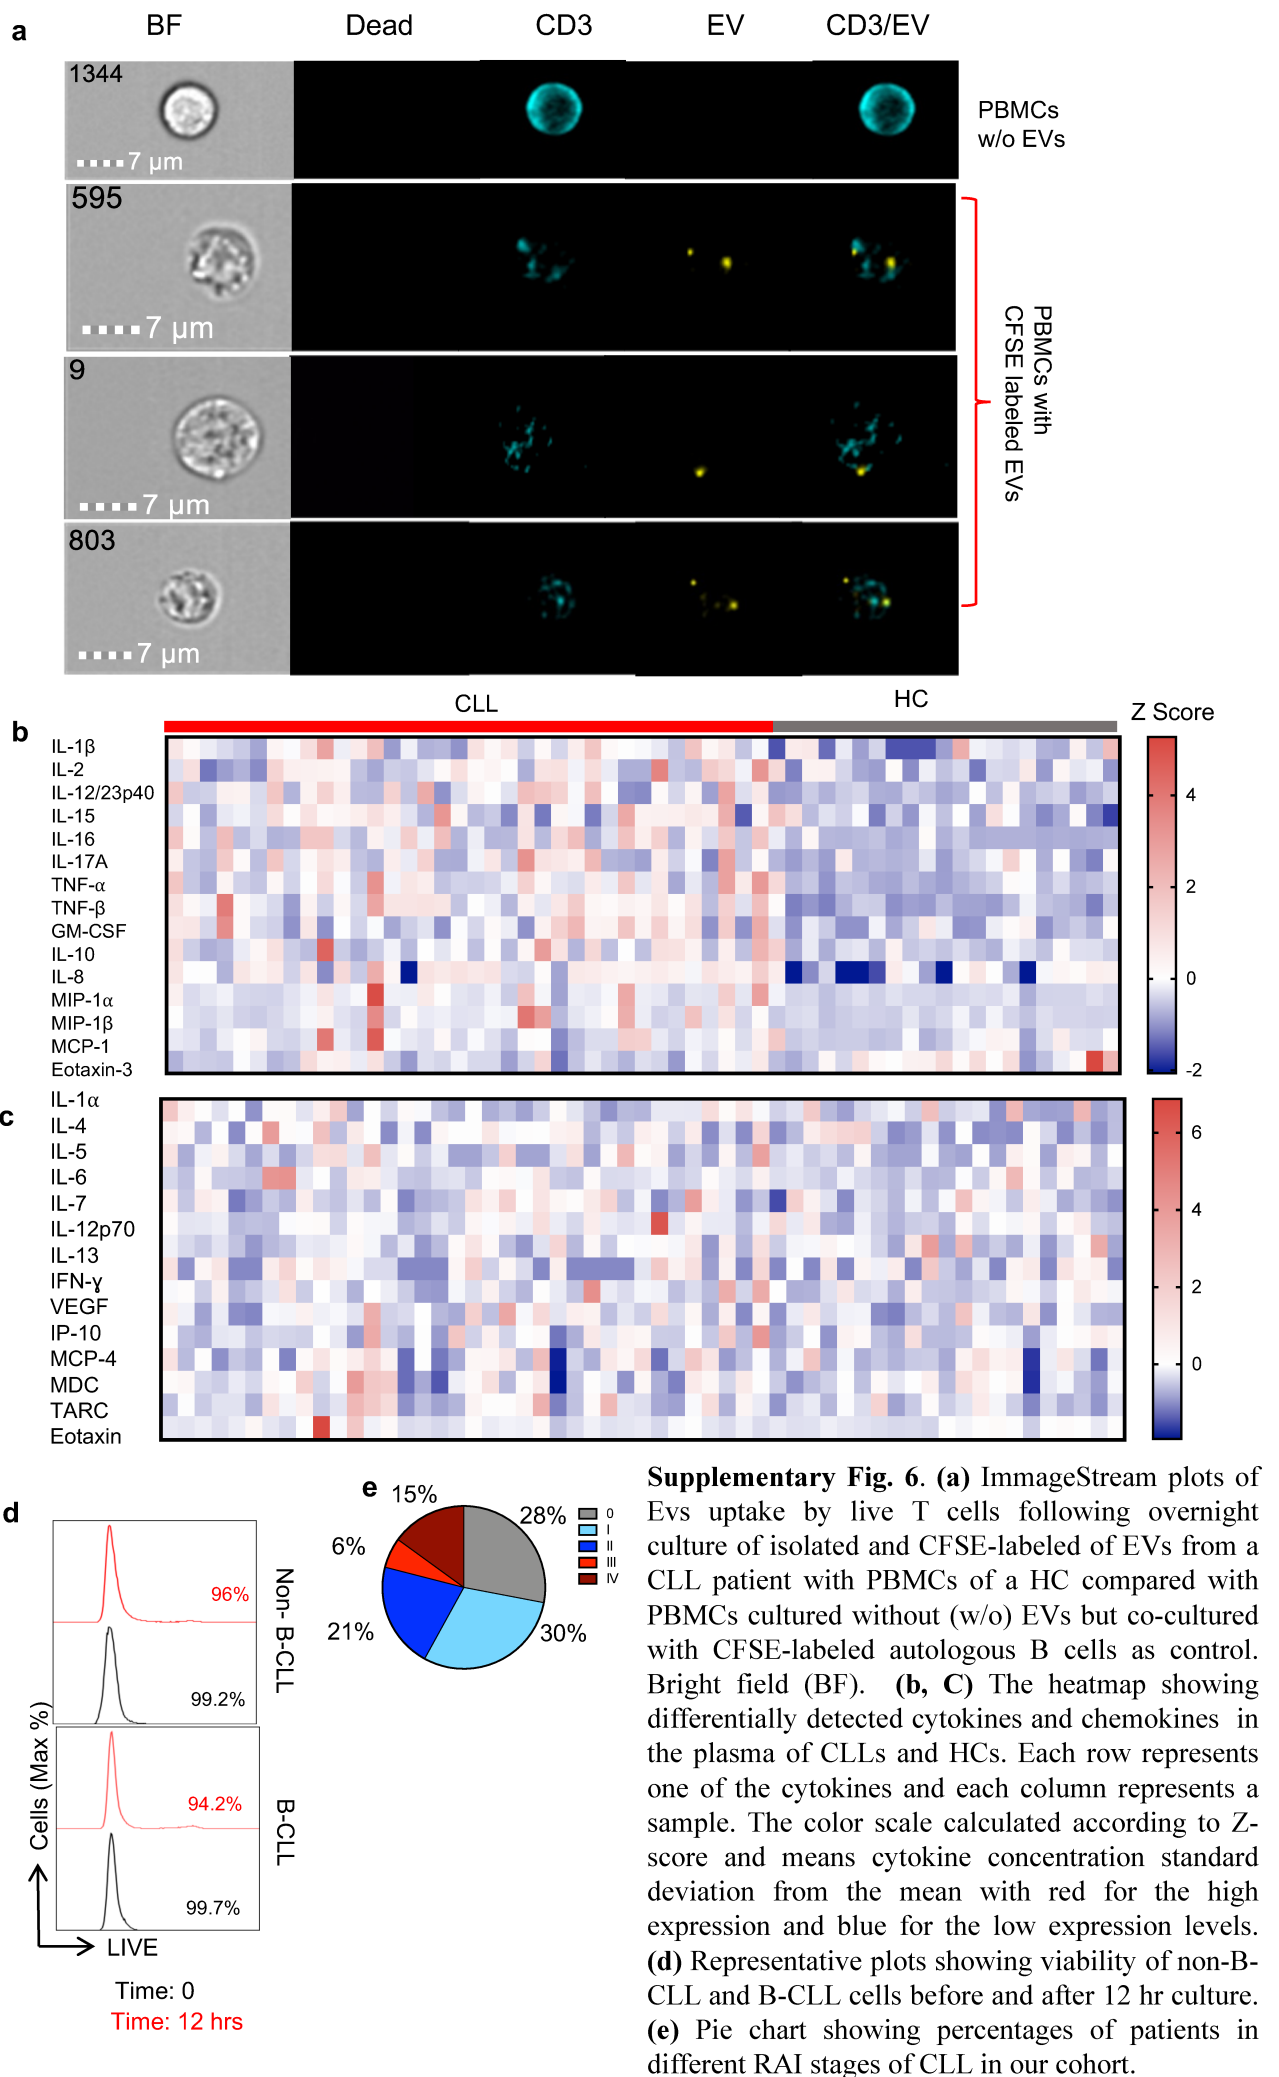

Supplement: jitc-2020-002189supp002.pdf [file jitc-2020-002189supp002.pdf]
