# Supplementary material for: Expanded antigen-experienced CD160+CD8+effector T cells exhibit impaired effector functions in chronic lymphocytic leukemia
Source: PubMed Central journal article supplement — J Immunother Cancer. 2021 Apr 30;9(4):e002189. doi: 10.1136/jitc-2020-002189 (PMC8098955; doi:10.1136/jitc-2020-002189), 2021-04-30
Supplement: jitc-2020-002189supp001.pdf [file jitc-2020-002189supp001.pdf]

Supplementary Table 1. Clinical data of CLL patients.

| No | Age Yrs | Sex | IgHV Mutation      | FISH Analysis     | Stage (Rai) | Treatment | Treatment Agents/Course                                                                                                                 | CD160 /CD8% | CD160 /CD4% | Plasma IL-16 (pg/ml) |
|----|---------|-----|--------------------|-------------------|-------------|-----------|-----------------------------------------------------------------------------------------------------------------------------------------|-------------|-------------|----------------------|
| 1  | 70      | M   | Not done, ZAP70(+) | Del13q/11q        | I           | T         | Bendamustine + Rituximab (May-Sep.2018)                                                                                                 | 10          | 7.3         | Not done             |
| 2  | 66      | M   | Not done, ZAP70(-) | Not done          | II          |           | N/A                                                                                                                                     | 9           | 1           | Not done             |
| 3  | 77      | M   | Not done           | Del17p/13q        | III         | T         | Rituximab+ Prednisone Ibrutinib (May 2018-Apr 2020)<br>Venetoclax (Apr 2020-Present)                                                    | Not done    | Not done    | Not done             |
| 4  | 76      | M   | Not done, ZAP70(-) | Del17p/13q        | IV          | T         | FCR x 5 cycles (Mar-Jun 2010)<br>FCR (Nov. 2015-Feb.2016)<br>Ibrutinib (May-Sep 2016)<br>Methylprednisolone + Rituximab (July-Sep 2018) | Not done    | Not done    | Not done             |
| 5  | 72      | M   | Unmutated          | Trisomy 12        | II          |           | N/A                                                                                                                                     | 52          | 2.8         | 5000                 |
| 6  | 51      | F   | Not done           | Not done          | I           |           | N/A                                                                                                                                     | 19          | 0.5         | 1882.4               |
| 7  | 54      | M   | Unmutated          | Del13q            | 0           |           | N/A                                                                                                                                     | 17          | 2           | 472.2                |
| 8  | 68      | M   | Not done           | Del13q            | II          |           | Chlorambucil + Obinutuzumab (started March 2020)                                                                                        | 27          | 1.1         | 5500                 |
| 9  | 75      | M   | Not done, ZAP70(-) | Del13q/17p (6.5%) | 0           | T         | FCR x 2 cycles (2012)                                                                                                                   | 51          | 0.4         | 444.7                |
| 10 | 60      | F   | Not done, ZAP70(-) | Not done          | 0           |           | N/A                                                                                                                                     | 23          | 1.2         | 936.3                |
| 11 | 86      | F   | Not done           | Not done          | 0           |           | N/A                                                                                                                                     | 17          | 2           | 248.2                |
| 12 | 85      | M   | Not done           | N/A               | 0           |           | N/A                                                                                                                                     | 42          | 2           | 315.84               |
| 13 | 78      | F   | Not done           | Del13q            | 0           |           | N/A                                                                                                                                     | 52          | Not done    | 4920.5               |
| 14 | 61      | M   | Not done           | Not done          | I           |           | N/A                                                                                                                                     | 32          | Not done    | 4900                 |
| 15 | 81      | M   | Not done           | Not done          | II          |           | N/A                                                                                                                                     | 38          | 2.2         | 361                  |

Supplementary Table 1. Clinical data of CLL patients.

|    |    |   |                  |                  |     |   |                                                                                                               |          |          |          |
|----|----|---|------------------|------------------|-----|---|---------------------------------------------------------------------------------------------------------------|----------|----------|----------|
| 16 | 62 | M | Not done         | Del11q/17p       | IV  | T | FCR (2006), RCVP (2008), Allogenic Stem Cell transplant (2008), Ibrutinib (2015) Venetoclax+ Rituximab (2018) | 25       | 7.5      | 2399.8   |
| 17 | 77 | M | Not done         | Not done         | 0   |   | N/A                                                                                                           | Not done | Not done | Not done |
| 18 | 80 | F | Not done         | Not done         | I   |   | N/A                                                                                                           | 27       | 2.3      | 1297.8   |
| 19 | 63 | M | Mutated ZAP70(+) | Del13q           | III |   | Ibrutinib+Venetoclax (started Jan.2019)                                                                       | 29       | 9.8      | 4493.4   |
| 20 | 65 | M | Unmutated        | Del 13q          | II  |   | Ibrutinib started (Feb 2020) Switched to Acalabrutinib (Sept 2020)                                            | Not done | Not done | 1305     |
| 21 | 73 | M | Unmutated        | Normal           | I   |   | Chlorambucil (started summer 2019) Ibrutinib (started Nov. 2019)                                              | Not done | Not done | 5200     |
| 22 | 82 | M | Not done         | Not done         | III | T | Bendamustine + Rituximab (Nov-Apr 2017)                                                                       | 23       | 1        | 265      |
| 23 | 74 | M | Not done         | Del13q           | IV  | T | Chlorambucil+ Obinutuzumab (Dec.2017)                                                                         | 22       | 1        | Not done |
| 24 | 71 | F | Not done         | Not done         | IV  | T | Bendamustine + Rituximab (Jul.2015) Ibrutinib (Aug. 2019-Nov. 2020)                                           | 41       | 21       | Not done |
| 25 | 78 | F | Not done         | Not done         | I   |   | N/A                                                                                                           | 13       | 0.5      | 1302.4   |
| 26 | 71 | F | Not done         | Del13q           | 0   | T | Bendamustine + Rituximab (Jul.2015)                                                                           | 16       | 1.7      | 302.2    |
| 27 | 62 | M | Not done         | Del17p<br>Del11q | I   | T | Chemo+ Transplant (2008), Ibrutinib Rituximab                                                                 | 8        | 1        | 330.4    |

Supplementary Table 1. Clinical data of CLL patients.

|    |    |   |           |                     |    |   |                                                                                  |          |          |          |
|----|----|---|-----------|---------------------|----|---|----------------------------------------------------------------------------------|----------|----------|----------|
| 28 | 63 | M | Not done  | Normal              | I  | T | Bendamustine + Rituximab (Apr. 2019)                                             | Not done | Not done | Not done |
| 29 | 74 | M | Unmutated | Del11q<br>Del17p    | 0  |   | Ibrutinib (Started Mar 2021)                                                     | 23       | 4.5      | 3211.5   |
| 30 | 70 | M | Unmutated | Trisomy 12          | I  |   | Acalabrutinib + Venetoclax + Obinutuzumab (Started Aug. 2019)                    | 52       | 28       | Not done |
| 31 | 63 | F | Not done  | Not done            | 0  |   | N/A                                                                              | 34       | 6        | 384      |
| 32 | 68 | M | Unmutated | Del11q<br>Del13q    | IV | T | FCR X 2 cycles (2017)<br>Ibrutinib (Feb. 2019-Sept. 2020)                        | 23       |          | 3738.3   |
| 33 | 53 | M | Mutated   | Del13q              | II |   | Acalabrutinib+ Venetoclax + Obinutuzumab (Started Oct. 2020)                     | 35       | 5        | 5400     |
| 34 | 54 | M | Not done  | Normal              | II |   | N/A                                                                              | Not done | Not done | 147.6    |
| 35 | 71 | M | Not done  | Normal              | II | T | Bendamustine + Rituximab (2014)<br>CHOP for ALCL (2017)<br>Ibrutinib (Jan. 2020) | 15.5     | 9        | 1065     |
| 36 | 91 | F | Not done  | Not done            | I  | T | Chlorambucil + Obinutuzumab (Started Jun. 2017)<br>Ibrutinib (Started May 2019)  | 11       | 12       | 5122     |
| 37 | 68 | M | Not done  | Not done            | II |   | N/A                                                                              | 6        | 7.5      | 2599     |
| 38 | 72 | M | Not done  | Del13q<br>Trisomy12 | IV | T | Chlorambucil + Obinutuzumab (Jun. 2019)                                          | 45       | 4.5      | 4385     |
| 39 | 63 | M | Mutated   | Del13q              | II | T | Ibrutinib+Venetoclax                                                             | 19       | 15       | 294      |
| 40 | 65 | F | Not done  | Not done            | 0  |   | N/A                                                                              | 14       | 7        | 2371.5   |
| 41 | 55 | F | Not done  | Not done            | 0  |   | N/A (TCH chemo for Breast Ca, Jan. 2018)                                         | 13       | 13       | 971      |

Supplementary Table 1. Clinical data of CLL patients.

|    |    |   |               |                                 |     |   |                                                                                                            |          |          |          |
|----|----|---|---------------|---------------------------------|-----|---|------------------------------------------------------------------------------------------------------------|----------|----------|----------|
| 42 | 59 | M | Indeterminate | Normal                          | II  |   | Bendamustine + Rituximab (Started Sept. 2019)                                                              | Not done | Not done | 4900     |
| 43 | 74 | F | Not done      | Del13q                          | I   |   | N/A                                                                                                        | 18       | 8        | 577.5    |
| 44 | 79 | F | Not done      | Del13q                          | I   | T | Chlorambucil + Obinutuzumab (Jul. 2019)                                                                    | 43       | 10       | 5023.6   |
| 45 | 70 | M | Unmutated     | Trisomy12                       | III |   | N/A                                                                                                        | 48       | 29       | Not done |
| 46 | 56 | F | Mutated       | Del13q<br>Del11q                | III |   | Bendamustine + Rituximab (Started Aug. 2019)                                                               | 45       | 13       | Not done |
| 47 | 72 | M | Not done      | Normal (2019)<br>Del11q<br>GAIN | IV  |   | Bendamustine + Rituximab (Aug.2019)<br>Switch to Ibrutinib (Nov. 2019)<br>RCHOP for Richter's (Sept. 2020) | 55       | 18       | 1257.8   |
| 48 | 45 | F | Mutated       | Del13q                          | II  |   | Bendamustine + Rituximab (Aug. 2019)                                                                       | 28       | 14       | Not done |
| 49 | 60 | F | Indeterminate | Trisomy12                       | II  |   | Bendamustine + Rituximab (Jun. 2019)                                                                       | 62       | 22       | Not done |
| 50 | 76 | M | Unmutated     | Trisomy12                       | I   |   | Acalabrutinib + Venetoclax (Oct. 2019)                                                                     | 50       | 17       | Not done |
| 51 | 74 | M | Unmutated     | Del13q<br>Trisomy12             | I   |   | Bendamustine + Rituximab (Oct. 2019)                                                                       | 49       | 36       | Not Done |
| 52 | 64 | M | Mutated       | Not done                        | 0   | T | Venetoclax+ Ibrutinib                                                                                      | 30       | 10       | Not done |
| 53 | 64 | M | Not done      | Del13q                          | 0   |   | N/A                                                                                                        | 17       | 7        | Not done |
| 54 | 67 | F | Not done      | Not done                        | 0   |   | N/A                                                                                                        | 25       | 11       | Not done |
| 55 | 60 | M | Not done      | Not done                        | I   |   | N/A                                                                                                        | 22       | 11.5     | Not done |
| 56 | 77 | M | N/A           | Del11q                          | I   | T | Ibrutinib+ Obinutuzumab. (2015)                                                                            | Not done | Not done | Not done |

Supplementary Table 1. Clinical data of CLL patients.

|  |  |  |  |  |  |  |                                  |  |  |  |
|--|--|--|--|--|--|--|----------------------------------|--|--|--|
|  |  |  |  |  |  |  | Venetoclax +<br>Rituximab (2019) |  |  |  |
|--|--|--|--|--|--|--|----------------------------------|--|--|--|

Sex: (M: Male, F: Female),

Staging: based on Rai staging system,

T Refers to the treatment

Green (off treatment), Orange (on treatment),

N/A: Not Available
